# Supplementary material
Source: publisher figshare collection journal article supplement (https://karger.figshare.com/articles/dataset/_/3505016)
Supplement: Supplementary file 2 [file 2]

# When is an endophenotype useful to detect association to a disease? Exploring the relationships between disease status, endophenotype and genetic polymorphisms

Alexandre Bureau<sup>1,2</sup>, Jordie Croteau<sup>2</sup>

Received \_\_\_\_\_; accepted \_\_\_\_\_

---

<sup>1</sup>Département de médecine sociale et préventive, Université Laval

<sup>2</sup>Institut universitaire en santé mentale de Québec du Centre intégré de santé et de services sociaux de la Capitale-Nationale

## Supplementary tables

Table S1: Values of the coefficients of linear models of the population risk allele frequency at locus 2 for polytomous phenotype scenario P2.

|                                   | pRAF <sup>a</sup> | Model conditional on $X_1$ |       |          |             | Model ignoring $X_1$ |       |          |
|-----------------------------------|-------------------|----------------------------|-------|----------|-------------|----------------------|-------|----------|
|                                   |                   | Intercept                  | $Y_2$ | $X_1Y_1$ | $X_1Y_1Y_2$ | Intercept            | $Y_2$ | $Y_1Y_2$ |
| Unrelated <sup>b</sup>            | 0.1               | 0.100                      | 0.081 | -0.026   | 0.149       | 0.099                | 0.082 | 0.013    |
|                                   | 0.3               | 0.299                      | 0.161 | -0.063   | 0.241       | 0.298                | 0.162 | 0.023    |
|                                   | 0.5               | 0.498                      | 0.166 | -0.079   | 0.225       | 0.497                | 0.168 | 0.022    |
| Ascertained families <sup>c</sup> | 0.3               | 0.389                      | 0.094 | -0.077   | 0.207       | 0.387                | 0.104 | 0.007    |

<sup>a</sup> Population risk allele frequency

<sup>b</sup> Least square fit to expected allele frequency at locus 2 for each combination of explanatory variables

<sup>c</sup> Least square fit to empirical allele frequency at locus 2 for each combination of explanatory variables in data simulated under the familial dependence simulation model with  $\sigma_2 = 1.0$ ,  $\alpha = \log(4) = 1.386$  and  $\nu = 0.01$  in 3-generation 16-members family depicted in Figure 2 ascertained for at least a cousin pair affected by the disease

Table S2: Values of the coefficients of linear models of the population risk allele frequency at locus 2 for polytomous phenotype scenario P3.

|                                   | pRAF <sup>a</sup> | Model conditional on $X_1$ |       |          |             | Model ignoring $X_1$ |        |          |
|-----------------------------------|-------------------|----------------------------|-------|----------|-------------|----------------------|--------|----------|
|                                   |                   | Intercept                  | $X_1$ | $X_1Y_1$ | $X_1Y_1Y_2$ | Intercept            | $Y_1$  | $Y_1Y_2$ |
| Unrelated <sup>b</sup>            | 0.1               | 0.100                      | 0.004 | -0.029   | 0.106       | 0.100                | -0.004 | 0.018    |
|                                   | 0.3               | 0.300                      | 0.009 | -0.070   | 0.228       | 0.298                | -0.008 | 0.043    |
|                                   | 0.5               | 0.500                      | 0.010 | -0.086   | 0.254       | 0.501                | -0.010 | 0.052    |
| Ascertained families <sup>c</sup> | 0.3               | 0.306                      | 0.025 | -0.066   | 0.181       | 0.311                | -0.010 | 0.035    |

<sup>a</sup> Population risk allele frequency

<sup>b</sup> Least square fit to expected allele frequency at locus 2 for each combination of explanatory variables

<sup>c</sup> Least square fit to empirical allele frequency at locus 2 for each combination of explanatory variables in data simulated under the familial dependence simulation model with  $\sigma_2 = 1.0$ ,  $\alpha = \log(4) = 1.386$  and  $\nu = 0.01$  in 3-generation 16-members family depicted in Figure 2 ascertained for at least a cousin pair affected by the disease

Table S3: Values of the coefficients of linear models of the population risk allele frequency at locus 2 for polytomous phenotype scenario P4.

|                                   | pRAF <sup>a</sup> | Model conditional on $X_1$ |       |          |             | Model ignoring $X_1$ |       |          |
|-----------------------------------|-------------------|----------------------------|-------|----------|-------------|----------------------|-------|----------|
|                                   |                   | Intercept                  | $Y_1$ | $X_1Y_1$ | $X_1Y_1Y_2$ | Intercept            | $Y_1$ | $Y_1Y_2$ |
| Unrelated <sup>b</sup>            | 0.1               | 0.096                      | 0.034 | -0.033   | 0.129       | 0.096                | 0.030 | 0.014    |
|                                   | 0.3               | 0.290                      | 0.075 | -0.069   | 0.246       | 0.290                | 0.067 | 0.030    |
|                                   | 0.5               | 0.487                      | 0.085 | -0.075   | 0.246       | 0.487                | 0.076 | 0.033    |
| Ascertained families <sup>c</sup> | 0.3               | 0.342                      | 0.063 | -0.044   | 0.193       | 0.342                | 0.061 | 0.017    |

<sup>a</sup> Population risk allele frequency

<sup>b</sup> Least square fit to expected allele frequency at locus 2 for each combination of explanatory variables

<sup>c</sup> Least square fit to empirical allele frequency at locus 2 for each combination of explanatory variables in data simulated under the familial dependence simulation model with  $\sigma_2 = 1.0$ ,  $\alpha = \log(4) = 1.386$  and  $\nu = 0.01$  in 3-generation 16-members family depicted in Figure 2 ascertained for at least a cousin pair affected by the disease

Table S4: Values of the coefficients of linear models of the population risk allele frequency at locus 2 for polytomous phenotype scenario P5.

|                                   | pRAF <sup>a</sup> | Model conditional on $X_1$ |       |                         |               | Model ignoring $X_1$ |       |
|-----------------------------------|-------------------|----------------------------|-------|-------------------------|---------------|----------------------|-------|
|                                   |                   | Intercept                  | $X_1$ | $X_1Y_2^*$ <sup>b</sup> | $X_1Y_1Y_2^*$ | Intercept            | $Y_2$ |
| Unrelated <sup>c</sup>            | 0.1               | 0.100                      | 0.003 | 0.175                   | -0.029        | 0.100                | 0.020 |
|                                   | 0.3               | 0.300                      | 0.006 | 0.324                   | -0.070        | 0.300                | 0.053 |
|                                   | 0.5               | 0.500                      | 0.006 | 0.318                   | -0.086        | 0.499                | 0.067 |
| Ascertained families <sup>d</sup> | 0.3               | 0.315                      | 0.072 | 0.217                   | -0.091        | 0.324                | 0.037 |

<sup>a</sup> Population risk allele frequency

<sup>b</sup>  $Y_2^* = 1 - Y_2$

<sup>c</sup> Least square fit to expected allele frequency at locus 2 for each combination of explanatory variables

<sup>d</sup> Least square fit to empirical allele frequency at locus 2 for each combination of explanatory variables in data simulated under the familial dependence simulation model with  $\sigma_2 = 1.0$ ,  $\alpha = \log(4) = 1.386$  and  $\nu = 0.01$  in 3-generation 16-members family depicted in Figure 2 ascertained for at least a cousin pair affected by the disease

Table S5: Values of the coefficients of linear models of the population risk allele frequency at locus 2 for transition scenario T2.

|                                   | pRAF <sup>a</sup> | Model conditional on $X_1$ |        |          | Model ignoring $X_1$ |       |
|-----------------------------------|-------------------|----------------------------|--------|----------|----------------------|-------|
|                                   |                   | Intercept                  | $X_1$  | $X_1Y_2$ | Intercept            | $Y_2$ |
| Unrelated <sup>b</sup>            | 0.1               | 0.100                      | -0.001 | 0.074    | 0.100                | 0.008 |
|                                   | 0.3               | 0.300                      | -0.003 | 0.160    | 0.300                | 0.019 |
|                                   | 0.5               | 0.500                      | -0.003 | 0.170    | 0.501                | 0.023 |
| Ascertained families <sup>c</sup> | 0.3               | 0.307                      | 0.027  | 0.109    | 0.311                | 0.015 |

<sup>a</sup> Population risk allele frequency

<sup>b</sup> Least square fit to expected allele frequency at locus 2 for each combination of explanatory variables

<sup>c</sup> Least square fit to empirical allele frequency at locus 2 for each combination of explanatory variables in data simulated under the familial dependence simulation model with  $\sigma_2 = 1.0$ ,  $\alpha = \log(4) = 1.386$  and  $\nu = 0.01$  in 3-generation 16-members family depicted in Figure 2 ascertained for at least a cousin pair affected by the disease

Table S6: Values of the coefficients of linear models of the population risk allele frequency at locus 2 for transition scenario T3.

|                                   | pRAF <sup>a</sup> | Model conditional on $X_1$ |          |          |             | Model ignoring $X_1$ |        |          |
|-----------------------------------|-------------------|----------------------------|----------|----------|-------------|----------------------|--------|----------|
|                                   |                   | Intercept                  | $Y_1Y_2$ | $X_1Y_1$ | $X_1Y_1Y_2$ | Intercept            | $Y_1$  | $Y_1Y_2$ |
| Unrelated <sup>b</sup>            | 0.1               | 0.100                      | 0.036    | -0.006   | 0.100       | 0.100                | -0.002 | 0.051    |
|                                   | 0.3               | 0.300                      | 0.080    | -0.016   | 0.180       | 0.300                | -0.004 | 0.111    |
|                                   | 0.5               | 0.500                      | 0.090    | -0.017   | 0.180       | 0.500                | -0.006 | 0.123    |
| Ascertained families <sup>c</sup> | 0.3               | 0.334                      | 0.053    | -0.060   | 0.223       | 0.336                | -0.021 | 0.107    |

<sup>a</sup> Population risk allele frequency

<sup>b</sup> Least square fit to expected allele frequency at locus 2 for each combination of explanatory variables

<sup>c</sup> Least square fit to empirical allele frequency at locus 2 for each combination of explanatory variables in data simulated under the familial dependence simulation model with  $\sigma_2 = 1.0$ ,  $\alpha = \log(4) = 1.386$  and  $\nu = 0.01$  in 3-generation 16-members family depicted in Figure 2 ascertained for at least a cousin pair affected by the disease
